# Supplementary material
Source: PubMed Central journal article supplement (PMC5167340)
Supplement: EMBJ-35-2686-s002.pdf [file EMBJ-35-2686-s002.pdf]

## Expanded View Figures

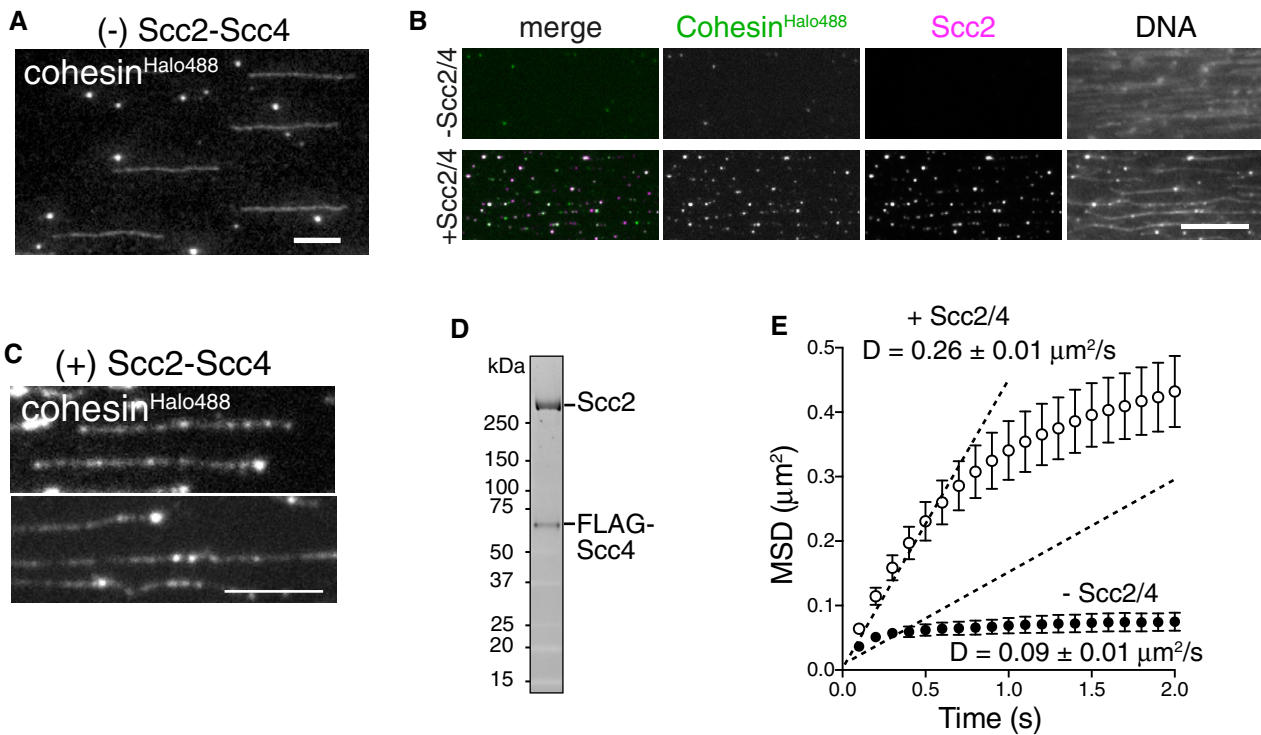

**Figure EV1. Proper loading of cohesin by Scc2-Scc4 is required for translocation ability (related to Fig 1).**

- A** Cohesin<sup>Halo488</sup> is specifically bound to DNA in the absence of Scc2-Scc4. Cohesin<sup>Halo488</sup> (3.25 nM) was directly loaded onto DNA and DNA-bound cohesin<sup>Halo488</sup> was observed. Cohesin<sup>Halo488</sup> signals were detected all along DNA. Scale bar, 10 μm.
- B** Cohesin<sup>Halo488</sup> was loaded onto DNA in the presence or absence of Scc2-Scc4 and washed in high-salt buffer. Scc2 was immunostained by anti-Scc2 antibody. DNA was counterstained with SYTOX. Scale bar, 10 μm.
- C** Cohesin<sup>Halo488</sup> specifically binds to DNA in the presence of Scc2-Scc4. Cohesin<sup>Halo488</sup> (3.25 nM) was loaded onto DNA after Scc2-Scc4 bound to DNA, and cohesin<sup>Halo488</sup> was observed. Note that cohesin<sup>Halo488</sup> signals were detected all along the DNA. Scale bar, 5 μm.
- D** SYPRO Ruby staining of the purified Scc2-Scc4 complex after separation by SDS-PAGE.
- E** Cohesin<sup>Halo488</sup> was loaded onto DNA as in (B). After high-salt wash, residual cohesin particles on DNA were observed in the presence of ATP and 100 mM KCl. MSD vs. time is shown. D indicates the diffusion coefficient ( $n = 45$ , mean ± s.e.m.).

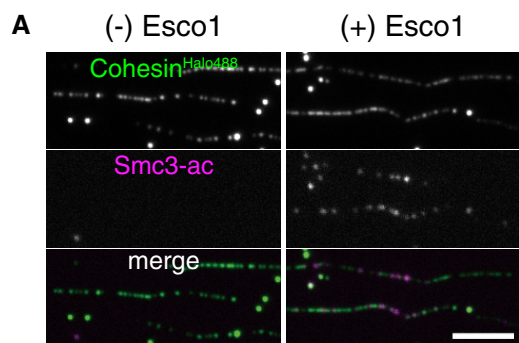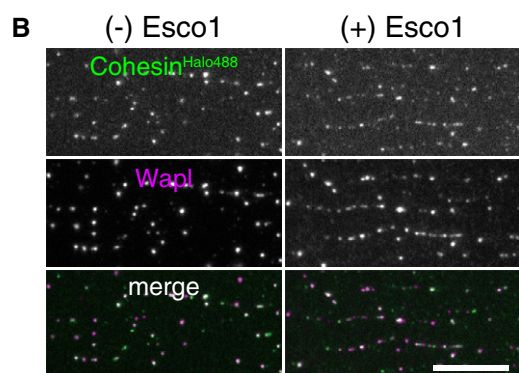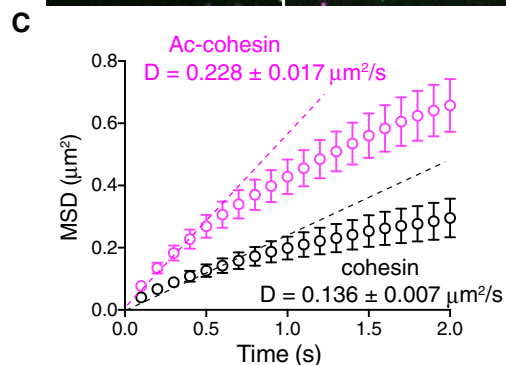

**Figure EV2. Acetylation of Smc3 facilitates cohesin translocation (related to Fig 2).**

A Topologically loaded cohesin<sup>Halo488</sup> (-Esco1) or ac-cohesin<sup>Halo488</sup> (+Esco1) was washed in high-salt buffer. Acetylated Smc3 (Smc3-ac) was detected by immunostaining. Scale bar, 5 μm.

B Topologically loaded cohesin<sup>Halo488</sup> (-Esco1) or ac-cohesin<sup>Halo488</sup> (+Esco1) was washed in high-salt buffer and treated with Wapl-Pds5. Wapl was detected by immunostaining. Scale bar, 10 μm.

C Cohesin<sup>Halo488</sup> was treated as in (A) and cohesin<sup>Halo488</sup> (cohesin) or acetylated cohesin<sup>Halo488</sup> (Ac-cohesin) particles were observed. MSD vs. time is shown. D indicates the diffusion coefficient ( $n = 45$ , mean  $\pm$  s.e.m.).
